# Supplementary material for: The Impact of O-Glycosylation on Cyanidin Interaction with RBCs and HMEC-1 Cells—Structure–Activity Relationships
Source: Int J Mol Sci. 2019 Apr 19;20(8):1928. doi: 10.3390/ijms20081928 (PMC6514962; doi:10.3390/ijms20081928)
Supplement: Supplementary file 1 [file ijms-20-01928-s001.pdf]

## The impact of O-glycosylation on cyanidin interaction with erythrocytes and HMEC-1 cells. SARs - structure-activity relationship

Sylwia Cyboran-Mikołajczyk<sup>1\*</sup>, Katarzyna Solarska-Ściuk<sup>1</sup>, Katarzyna Mieszala<sup>2</sup>, Natalia Glatzel-Plucińska<sup>2</sup>, Karolina Matczak<sup>3</sup>, Halina Kleszczyńska<sup>1</sup>

<sup>1</sup>Department of Physics and Biophysics, Wrocław University of Environmental and Life Sciences, Norwida 25, 50-375 Wrocław, Poland,

<sup>2</sup>Department of Histology and Embryology, Medical University of Wrocław, Chałubińskiego 6a, 50-368 Wrocław, Poland

<sup>3</sup>Department of Medicinal Biophysics, University of Łódź, Pomorska 141/143, 90-236 Łódź, Poland

\*Corresponding author: tel. +48713205275, fax. +48713205167, e-mail: [sylwia.cyboran@upwr.edu.pl](mailto:sylwia.cyboran@upwr.edu.pl), address: Department of Physics and Biophysics, Wrocław University of Environmental and Life Sciences, Norwida 25, 50-375 Wrocław, Poland,

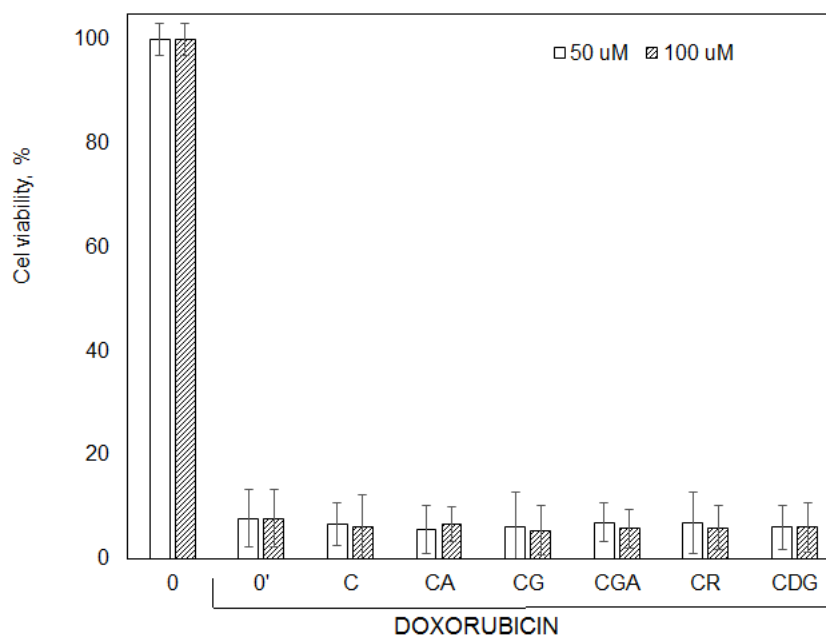

**Fig. 1S** The viability of HMEC-1 cells pre-treated with cyanidin and its O-glycosides for 24 h and treated with doxorubicin for next 24. Cells variability was determined using XTT assay. Cyanidin (C), cyanidin-3-*O*-arabinoside (CA), cyanidin-3-*O*-glucoside (CG) cyanidin-3-*O*-rutinoside (CR) and cyanidin-3-5-*O*-diglucoside (CDG), control (0), ethanol-treated cells (0').

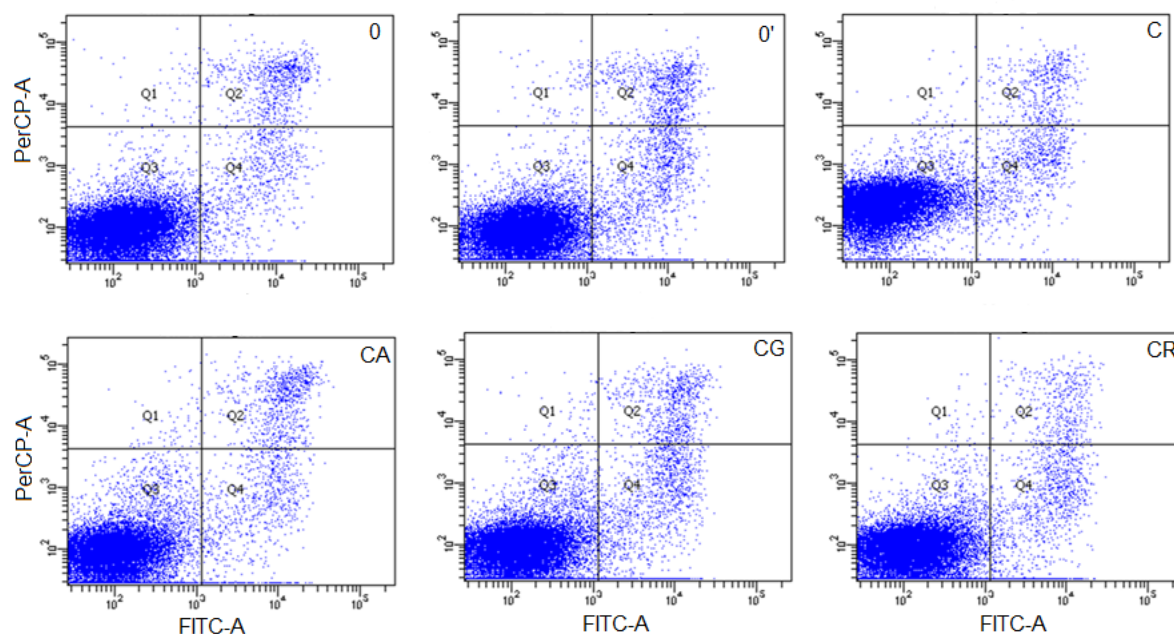

**Fig. 2S** An example representative flow cytometric analysis of cyanidin and its glycosides-treated HMEC-1 cells. Cells were stained with FITC Annexin V and propidium iodide (PI) after treatment with 50  $\mu$ M of the compounds for 48 h. The graphs show the number of live (Q<sub>3</sub>), early apoptotic (Q<sub>4</sub>), late apoptotic (Q<sub>2</sub>) and necrotic (Q<sub>1</sub>) stages of cell cycle. Cyanidin (C), cyanidin-3-*O*-arabinoside (CA), cyanidin-3-*O*-glucoside (CG) cyanidin-3-*O*-rutinoside (CR) and cyanidin-3-5-*O*-diglucoside (CDG), control (0), ethanol-treated cells (0').

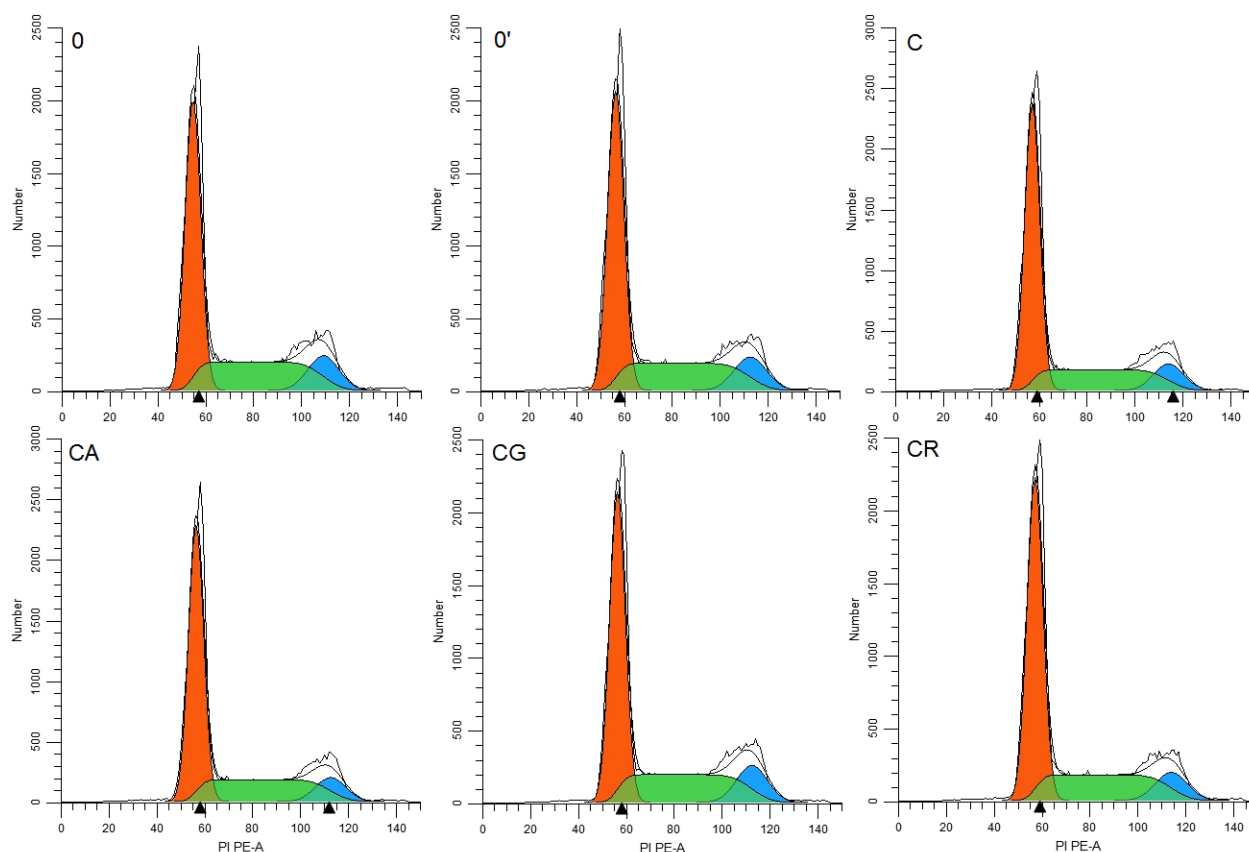

**Fig. 3S** An example representative flow cytometric analysis of cyanidin and its glycosides-treated HMEC-1 cells. Cells were stained with propidium iodide after treatment with 50  $\mu$ M of the compounds for 48 h. The histograms show the number of cells in G<sub>1</sub> (red), S (green) and G<sub>2</sub>/M (blue) stages of cell cycle, respectively. Cyanidin (C), cyanidin-3-*O*-arabinoside (CA), cyanidin-3-*O*-glucoside (CG) cyanidin-3-*O*-rutinoside (CR) and cyanidin-3-5-*O*-diglucoside (CDG), control (0), ethanol-treated cells (0').
